# Supplementary material for: Representative Elementary Volume Estimation and Neural Network-Based Prediction of Change Rates of Dense Non-Aqueous Phase Liquid Saturation and Dense Non-Aqueous Phase Liquid–Water Interfacial Area in Porous Media
Source: MDPI journal article supplement (doi:10.3390/separations10080446), 2023-08-10
Supplement: s1 [file s1]

## Supplementary Material

Representative elementary volume estimation and neural network based prediction of change rates of DNAPL saturation and DNAPL-water interfacial area in porous media

Zhou Cheng<sup>1,2,#</sup>, Guoping Lu<sup>2,#</sup>, Ming Wu<sup>2,3,4,\*</sup>, Yanru Hao<sup>2</sup>, Cehui Mo<sup>2</sup>, Qusheng Li<sup>5</sup>, Jianfeng Wu<sup>3</sup>, Jichun Wu<sup>3</sup>, Bill X. Hu<sup>2,6</sup>

<sup>1</sup>Guangdong Provincial Academy of Environmental Science, Guangzhou 510045, China

<sup>2</sup>Guangdong Provincial Research Center for Environment Pollution Control and Remediation Materials, College of Life Science and Technology, Jinan University, Guangzhou 510632, China

<sup>3</sup>Key Laboratory of Surficial Geochemistry, Ministry of Education; Department of Hydrosciences, School of Earth Sciences and Engineering, Nanjing University, Nanjing 210023, China

<sup>4</sup>Guangdong Yixin Ecological Technology Co., Ltd, Guangzhou 510055, China

<sup>5</sup>Guangdong Key Laboratory of Environmental Pollution and Health, School of Environment, Jinan University, Guangzhou 510632, China

<sup>6</sup>School of Water Conservancy and Environment, University of Jinan, Jinan 250022, China

<sup>#</sup>These authors contributed equally to this work and should be considered co-first authors

Correspondence to: M. Wu ([wumingnj@foxmail.com](mailto:wumingnj@foxmail.com))

## Text S1. The spatial moment

The spatial moment method is utilized to analyze the spatial movement of PCE plume (Fig. 2a) and associated characteristics. The spatial moment is defined as (Zheng et al., 2015; Natarajan and Kumar, 2018):

$$M_{ij}(t) = \int_{x_0}^{x_1} \int_{z_0}^{z_1} \theta(x, z) S_0(x, z, t) x^i z^j dx dz \quad (S1)$$

where  $M_{ij}$  is the spatial moment of PCE plume at time  $t$ ;  $S_0(x, z, t)$  is PCE saturation at place  $(x, z)$  when time is  $t$ ;  $i$  and  $j$  are the orders of moment along  $x$  and  $z$  directions, respectively.

The first moments of PCE plume is expressed as:

$$\sigma_x = \frac{M_{10}}{M_{00}} \quad (S2)$$

$$\sigma_z = \frac{M_{01}}{M_{00}} \quad (S3)$$

where  $\sigma_x$  and  $\sigma_z$  are first moments along  $x$  and  $z$  directions, respectively;  $M_{10}$  is calculated based on Eq. (5) that  $i=1, j=0$ .

The distribution range of PCE plume around the mass centroid can be characterized by the second moments:

$$\sigma_{xx} = \frac{M_{20}}{M_{00}} - \sigma_x^2 \quad (S4)$$

$$\sigma_{zz} = \frac{M_{02}}{M_{00}} - \sigma_z^2 \quad (S5)$$

where  $\sigma_{xx}$  and  $\sigma_{zz}$  are second moments along  $x$  and  $z$  directions, respectively.

## Text S2. GTP analysis

Ganglia-to-pool ratio (GTP) characterizing architecture of contaminant plume is derived as the ratio of ganglia mass to pool mass (Christ et al., 2006). The ganglia PCE and pooled PCE usually is dominated by a threshold saturation equal to maximum residual PCE saturation.

### Text S3. REV estimation

The relative gradient error ( $\varepsilon_g^i$ ) (Costanza-Robinson et al., 2011; Wu et al., 2020) is used to estimate REV's of  $S_o$  rate and  $A_{OW}$  rate:

$$\varepsilon_g^i = \left| \frac{\varphi^{i+1} - \varphi^{i-1}}{\varphi^{i+1} + \varphi^{i-1}} \right| \frac{1}{\Delta L} \quad (\text{S6})$$

where  $\varphi$  is the variable such as  $S_o$  rate or  $A_{OW}$  rate;  $i$  is the increment number of measured length;  $\Delta L$  is the increment length.

**Table S1.** Experimental conditions

| Experiment                          | I           | II          | III         | IV                |
|-------------------------------------|-------------|-------------|-------------|-------------------|
| Sandbox dimensions (cm)             | 60×45       | 60×45       | 60×45       | 60×45             |
| Packed translucent silica sand      | F20/30      | F20/30      | F20/30      | F20/30 and lenses |
| Medium condition                    | Homogeneity | Homogeneity | Homogeneity | Heterogeneity     |
| Sodium chloride concentration (g/L) | 0.585       | 32          | 0.585       | 0.585             |
| Tween 80 concentration (mg/L)       | 0.0         | 0.0         | 20.0        | 0.0               |
| V <sub>PCE</sub> (ml)               | 32          | 32          | 20          | 40                |
| Injection rate (ml/min)             | 0.5         | 0.5         | 0.5         | 0.5               |

**Table S2.** The fitted models between average REV of  $S_o$  rate,  $A_{OW}$  rate and  $d_I$ ,  $d_m$ 

| Experiment | $d_I$                                                                                                                                     | $d_M$                                                                                                                          |
|------------|-------------------------------------------------------------------------------------------------------------------------------------------|--------------------------------------------------------------------------------------------------------------------------------|
| I          | SR-REV<br>$\overline{REV} = -2.83 \times 10^{-10} \cdot d_I^2 + 1.33 \times 10^{-7} \cdot d_I$<br>$- 7.95 \times 10^{-6}$<br>$(R^2=0.45)$ | $\overline{REV} = 3.54 \times 10^{-10} \cdot d_M^2 + 8.16 \times 10^{-8} \cdot d_M$<br>$+ 1.91 \times 10^{-6}$<br>$(R^2=0.44)$ |
|            | AR-REV<br>$\overline{REV} = -3.31 \times 10^{-8} \cdot d_I^2 + 3.16 \times 10^{-5} \cdot d_I$<br>$+ 9.60 \times 10^{-4}$<br>$(R^2=0.31)$  | $\overline{REV} = 1.71 \times 10^{-7} \cdot d_M^2 - 3.76 \times 10^{-5} \cdot d_M$<br>$+ 3.52 \times 10^{-3}$<br>$(R^2=0.41)$  |
| II         | SR-REV<br>$\overline{REV} = 1.11 \times 10^{-10} \cdot d_I^2 - 1.54 \times 10^{-8} \cdot d_I$<br>$+ 5.47 \times 10^{-6}$<br>$(R^2=0.38)$  | $\overline{REV} = 1.87 \times 10^{-10} \cdot d_M^2 - 5.03 \times 10^{-8} \cdot d_M$<br>$+ 7.51 \times 10^{-6}$<br>$(R^2=0.51)$ |
|            | AR-REV<br>$\overline{REV} = 8.24 \times 10^{-9} \cdot d_I^2 + 4.72 \times 10^{-6} \cdot d_I$<br>$+ 2.58 \times 10^{-3}$<br>$(R^2=0.24)$   | $\overline{REV} = 5.33 \times 10^{-8} \cdot d_M^2 - 1.54 \times 10^{-5} \cdot d_M$<br>$+ 4.02 \times 10^{-3}$<br>$(R^2=0.39)$  |
| III        | SR-REV<br>$\overline{REV} = 1.77 \times 10^{-10} \cdot d_I^2 - 6.68 \times 10^{-8} \cdot d_I$<br>$+ 1.53 \times 10^{-5}$<br>$(R^2=0.40)$  | $\overline{REV} = 2.35 \times 10^{-9} \cdot d_M^2 - 8.82 \times 10^{-7} \cdot d_M$<br>$+ 8.24 \times 10^{-5}$<br>$(R^2=0.71)$  |
|            | AR-REV<br>$\overline{REV} = 8.56 \times 10^{-8} \cdot d_I^2 - 2.38 \times 10^{-5} \cdot d_I$<br>$+ 4.32 \times 10^{-3}$<br>$(R^2=0.16)$   | $\overline{REV} = 1.26 \times 10^{-6} \cdot d_M^2 - 5.64 \times 10^{-4} \cdot d_M$<br>$+ 6.07 \times 10^{-2}$<br>$(R^2=0.66)$  |
| IV         | SR-REV<br>$\overline{REV} = -4.88 \times 10^{-11} \cdot d_I^2 + 2.86 \times 10^{-8} \cdot d_I$<br>$- 4.98 \times 10^{-6}$<br>$(R^2=0.33)$ | $\overline{REV} = 4.17 \times 10^{-10} \cdot d_M^2 - 1.15 \times 10^{-7} \cdot d_M$<br>$+ 2.61 \times 10^{-6}$<br>$(R^2=0.80)$ |
|            | AR-REV<br>$\overline{REV} = 3.62 \times 10^{-10} \cdot d_I^2 + 6.79 \times 10^{-7} \cdot d_I$<br>$- 1.48 \times 10^{-4}$<br>$(R^2=0.48)$  | $\overline{REV} = 2.21 \times 10^{-8} \cdot d_M^2 - 5.89 \times 10^{-6} \cdot d_M$<br>$+ 1.93 \times 10^{-4}$<br>$(R^2=0.84)$  |

\* $\overline{REV}$  is the average value of REV size,  $d_m$  is the distance from mass center of PCE plume to the cell contained in PCE plume,  $d_I$  is the distance from injection point to the cell contained in PCE plume

**Table S3.** The predicted frequency of SR-REV by BP neural network

| Time (min) | I                                                                                                                           | II                                                                                                                         | III                                                                                                                        | IV                                                                                                                          |
|------------|-----------------------------------------------------------------------------------------------------------------------------|----------------------------------------------------------------------------------------------------------------------------|----------------------------------------------------------------------------------------------------------------------------|-----------------------------------------------------------------------------------------------------------------------------|
| 5          | $F$<br>$= 2.26 \times 10^{-7}$<br>$+ \frac{1}{2\pi \times 3.09} e^{-\frac{(REV-8.37)^2}{2 \times 3.09^2}}$<br>$(R^2=0.36)$  | $F$<br>$= 2.36 \times 10^{-8}$<br>$+ \frac{1}{2\pi \times 2.62} e^{-\frac{(REV-5.57)^2}{2 \times 2.62^2}}$<br>$(R^2=0.29)$ | $F$<br>$= 8.78 \times 10^{-8}$<br>$+ \frac{1}{2\pi \times 4.64} e^{-\frac{(REV-7.56)^2}{2 \times 4.64^2}}$<br>$(R^2=0.15)$ | $F$<br>$= 2.30 \times 10^{-8}$<br>$+ \frac{1}{2\pi \times 4.04} e^{-\frac{(REV-7.94)^2}{2 \times 4.04^2}}$<br>$(R^2=0.16)$  |
| 21         | $F$<br>$= 3.25 \times 10^{-8}$<br>$+ \frac{1}{2\pi \times 4.32} e^{-\frac{(REV-8.85)^2}{2 \times 4.32^2}}$<br>$(R^2=0.33)$  | $F$<br>$= 1.50 \times 10^{-7}$<br>$+ \frac{1}{2\pi \times 3.96} e^{-\frac{(REV-7.92)^2}{2 \times 3.96^2}}$<br>$(R^2=0.38)$ | $F$<br>$= 9.49 \times 10^{-9}$<br>$+ \frac{1}{2\pi \times 3.60} e^{-\frac{(REV-8.19)^2}{2 \times 3.60^2}}$<br>$(R^2=0.25)$ | $F$<br>$= 1.94 \times 10^{-8}$<br>$+ \frac{1}{2\pi \times 3.87} e^{-\frac{(REV-8.54)^2}{2 \times 3.87^2}}$<br>$(R^2=0.17)$  |
| 80         | $F$<br>$= 5.06 \times 10^{-9}$<br>$+ \frac{1}{2\pi \times 4.34} e^{-\frac{(REV-8.96)^2}{2 \times 4.34^2}}$<br>$(R^2=0.29)$  | $F$<br>$= 6.41 \times 10^{-8}$<br>$+ \frac{1}{2\pi \times 3.81} e^{-\frac{(REV-9.94)^2}{2 \times 3.81^2}}$<br>$(R^2=0.34)$ | $F$<br>$= 1.15 \times 10^{-7}$<br>$+ \frac{1}{2\pi \times 3.71} e^{-\frac{(REV-9.50)^2}{2 \times 3.71^2}}$<br>$(R^2=0.36)$ | $F$<br>$= 2.01 \times 10^{-8}$<br>$+ \frac{1}{2\pi \times 3.92} e^{-\frac{(REV-9.26)^2}{2 \times 3.92^2}}$<br>$(R^2=0.25)$  |
| 1523       | $F$<br>$= 1.01 \times 10^{-8}$<br>$+ \frac{1}{2\pi \times 3.29} e^{-\frac{(REV-10.72)^2}{2 \times 3.29^2}}$<br>$(R^2=0.50)$ | $F$<br>$= 1.30 \times 10^{-8}$<br>$+ \frac{1}{2\pi \times 3.75} e^{-\frac{(REV-9.85)^2}{2 \times 3.75^2}}$<br>$(R^2=0.38)$ | $F$<br>$= 7.13 \times 10^{-9}$<br>$+ \frac{1}{2\pi \times 3.86} e^{-\frac{(REV-9.81)^2}{2 \times 3.86^2}}$<br>$(R^2=0.28)$ | $F$<br>$= 4.13 \times 10^{-7}$<br>$+ \frac{1}{2\pi \times 3.50} e^{-\frac{(REV-10.32)^2}{2 \times 3.50^2}}$<br>$(R^2=0.50)$ |

\*F represents the frequency of REV

**Table S4.** The predicted frequency of AR-REV by BP neural network

| Time<br>(min) | I                                                                                                                           | II                                                                                                                          | III                                                                                                                         | IV                                                                                                                          |
|---------------|-----------------------------------------------------------------------------------------------------------------------------|-----------------------------------------------------------------------------------------------------------------------------|-----------------------------------------------------------------------------------------------------------------------------|-----------------------------------------------------------------------------------------------------------------------------|
| 5             | $F$<br>$= 2.43 \times 10^{-8}$<br>$+ \frac{1}{2\pi \times 3.29} e^{-\frac{(REV-8.65)^2}{2 \times 3.29^2}}$<br>$(R^2=0.33)$  | $F$<br>$= 5.69 \times 10^{-9}$<br>$+ \frac{1}{2\pi \times 0.56} e^{-\frac{(REV-14.09)^2}{2 \times 0.56^2}}$<br>$(R^2=0.97)$ | $F$<br>$= 3.09 \times 10^{-8}$<br>$+ \frac{1}{2\pi \times 3.31} e^{-\frac{(REV-7.65)^2}{2 \times 3.31^2}}$<br>$(R^2=0.16)$  | $F$<br>$= 4.93 \times 10^{-8}$<br>$+ \frac{1}{2\pi \times 3.53} e^{-\frac{(REV-9.92)^2}{2 \times 3.53^2}}$<br>$(R^2=0.22)$  |
| 21            | $F$<br>$= 1.15 \times 10^{-8}$<br>$+ \frac{1}{2\pi \times 3.62} e^{-\frac{(REV-9.15)^2}{2 \times 3.62^2}}$<br>$(R^2=0.40)$  | $F$<br>$= 4.32 \times 10^{-9}$<br>$+ \frac{1}{2\pi \times 4.11} e^{-\frac{(REV-8.96)^2}{2 \times 4.11^2}}$<br>$(R^2=0.17)$  | $F$<br>$= 1.42 \times 10^{-7}$<br>$+ \frac{1}{2\pi \times 3.26} e^{-\frac{(REV-10.03)^2}{2 \times 3.26^2}}$<br>$(R^2=0.37)$ | $F$<br>$= 9.10 \times 10^{-8}$<br>$+ \frac{1}{2\pi \times 3.44} e^{-\frac{(REV-10.91)^2}{2 \times 3.44^2}}$<br>$(R^2=0.40)$ |
| 80            | $F$<br>$= 5.12 \times 10^{-10}$<br>$+ \frac{1}{2\pi \times 3.61} e^{-\frac{(REV-9.48)^2}{2 \times 3.61^2}}$<br>$(R^2=0.46)$ | $F$<br>$= 1.63 \times 10^{-7}$<br>$+ \frac{1}{2\pi \times 3.84} e^{-\frac{(REV-9.83)^2}{2 \times 3.84^2}}$<br>$(R^2=0.32)$  | $F$<br>$= 4.30 \times 10^{-7}$<br>$+ \frac{1}{2\pi \times 3.58} e^{-\frac{(REV-9.86)^2}{2 \times 3.58^2}}$<br>$(R^2=0.49)$  | $F$<br>$= 1.21 \times 10^{-7}$<br>$+ \frac{1}{2\pi \times 3.35} e^{-\frac{(REV-10.96)^2}{2 \times 3.35^2}}$<br>$(R^2=0.50)$ |
| 1523          | $F$<br>$= 9.52 \times 10^{-8}$<br>$+ \frac{1}{2\pi \times 3.47} e^{-\frac{(REV-10.08)^2}{2 \times 3.47^2}}$<br>$(R^2=0.50)$ | $F$<br>$= 2.09 \times 10^{-8}$<br>$+ \frac{1}{2\pi \times 3.70} e^{-\frac{(REV-9.54)^2}{2 \times 3.70^2}}$<br>$(R^2=0.38)$  | $F$<br>$= 5.63 \times 10^{-9}$<br>$+ \frac{1}{2\pi \times 4.10} e^{-\frac{(REV-8.88)^2}{2 \times 4.10^2}}$<br>$(R^2=0.36)$  | $F$<br>$= 4.63 \times 10^{-9}$<br>$+ \frac{1}{2\pi \times 3.53} e^{-\frac{(REV-9.91)^2}{2 \times 3.53^2}}$<br>$(R^2=0.54)$  |

\*F represents the frequency of REV

## References

- Christ, J.A.; Ramsburg, C.A.; Pennell, K.D.; Abriola, L.M. Estimating mass discharge from dense nonaqueous phase liquid source zones using upscaled mass transfer coefficients: an evaluation using multiphase numerical simulations. *Water Resour. Res.* 2006, 42, W11420.
- Costanza-Robinson, M.S.; Estabrook, B.D.; Fouhey, D.F. Representative elementary volume estimation for porosity, moisture saturation, and air-water interfacial areas in unsaturated porous media: Data quality implication. *Water Resour. Res.* 2011, 47, W07513.
- Natarajan, N.; Kumar, G.S. Spatial moment analysis of multispecies contaminant transport in porous media. *Environ. Eng. Res.* 2018, 23 (1), 76–83.
- Wu, M.; Wu, J.F.; Wu, J.C.; Hu, B.X. A new criterion for determining the representative elementary volume of translucent porous media and inner contaminant. *Hydrolo. Earth Syst. Sci.* 2020, 24(12):5903-5917.
- Zheng, F.; Gao, Y.W.; Sun, Y.Y.; Shi, X.Q.; Xu, H.X.; Wu, J.C. Influence of flow velocity and spatial heterogeneity on DNAPL migration in porous media: insights from laboratory experiments and numerical modeling. *Hydrogeol. J.* 2015, 23, 1703.
